# Supplementary material for: Haplotype Association between Haptoglobin (Hp2) and Hp Promoter SNP (A-61C) May Explain Previous Controversy of Haptoglobin and Malaria Protection
Source: PLoS One. 2007 Apr 11;2(4):e362. doi: 10.1371/journal.pone.0000362 (PMC1838521; doi:10.1371/journal.pone.0000362)
Supplement: Table S1 — Haptoglobin Hp1/Hp2-PCR conditions and primer sequences-method adapted from Koch et al. 2003 (0.02 MB XLS) [file pone.0000362.s001.xls]

## Sheet: Sheet1
	Tablle S1. Haptoglobin Hp1/Hp2 - PCR conditions and primer sequences - method adapted from Koch et al. 2003
	reaction mix for Hp2 allele	ul per reaction	final concentrations/ amounts		reaction mix for Hp1 allele	ul per reaction	final concentrations/ amounts
	PE buffer x 10	1	x1		PE buffer x 10	1	x1
	MgCl2 25 mM	0.8	1.5 uM		MgCl2 25 mM	0.8	1.5 uM
	dNTPs 8 mM	0.25	200 umol		dNTPs 8 mM	0.25	200 umol
	Hp-Koch Primer mix C & D (both 5 uM)	0.6	0.3uM		Hp-Koch Primer mix A & B (both 5 uM)	0.6	0.3uM
	Control primer mix "T" (F&R) 5uM	0.3	0.15 uM		Control primer mix "A"(F&R) 5uM	0.3	0.15 uM
	TAQ GOLD 5U/ul	0.1	0.5U/ul		TAQ GOLD 5U/ul	0.1	0.5U/ul
	H20 millipore 18.2	1.95			H20 millipore 18.2	1.95
	Total reaction mix	5			Total reaction mix
	DNA 1 ng/ul	5	5 ng		DNA 1 ng/ul	5	5 ng
	total reaction mix + DNA/well	10			total reaction mix + DNA/well	10
	Cycling parameters				Gel = 1% Agarose, 220mV, aprox 75-90 mins
	temp	time
	95	14			AB = 1757bp	Hp1 allele product
	95	30sec	|		CD = 349 bp	Hp2 allele product
	69	30sec	|	x35	A = aprox 1100 bp	control product
	72	2min	|		T =aprox 659 bp	control product
	72	7
	Primer A	F	5'-GAG GGG AGC TTG CCT TTC CAT TG-3'
	Primer B	R	5'-GAG ATT TTT GAG CCC TGG CTG GT-3'
	Primer C	F	5'-CCT GCC TCG TAT TAA CTG CAC CAT-3'
	Primer D	R	5'-CCG AGT GCT CCA CAT AGC CAT GT-3'
	Control Primer A	F	5' ACA CAG AAC CCA CGG ACA CA
		R	5' AGG CGC TAA CCA GGA TGT TC
	Control Primer T	F	5' GAG AAA GGC CCA GAC TCC AAG CAT C-3'
		R	5' GTG TAG ACC TGA CCA GCG AGT GTG-3'
