# Supplementary material for: Haplotype Association between Haptoglobin (Hp2) and Hp Promoter SNP (A-61C) May Explain Previous Controversy of Haptoglobin and Malaria Protection
Source: PLoS One. 2007 Apr 11;2(4):e362. doi: 10.1371/journal.pone.0000362 (PMC1838521; doi:10.1371/journal.pone.0000362)
Supplement: Table S2 — Haptoglobin deletion assay-PCR conditions and primer sequences-method adapted from Koda et al. 2000 (0.02 MB XLS) [file pone.0000362.s002.xls]

## Sheet: Sheet1
	Table S2. Haptoglobin deletion assay - PCR conditions and primer sequences - method adapted from Koda et al. 2000
		Hp del for 1 reaction	1 mM MgCl2 0.25 uM primer	final concentrations/ amounts
		PE buffer x 10	1	1x
		MgCl2 25 mM	0.6	1 uM
		dNTPs 8 mM	0.375	200 umol
		Primer delU/L mix 5 uM	0.75	0.025
		Primer Exon1U/L 5uM	0.75	0.025
		TAQ GOLD 5U/ul	0.15	0.05U
		H20 millipore 18.2	1.375
		DNA 1 ng/ul	10	10 ng
		reaction mix to add to DNA	5
		total reaction mix	15
		Cycling parameters
		temp	time
		95	14min
		95	30s	|
		60	30s	|	x35
		72	1min	|
		72	7min
		Gel = 1% Agarose, 220mV, aprox 75-90 mins
		delU = 315 bp	Hp-deletion
		Hp-Ex1 = 479 bp	Hp - wild type
	Primer sequences
	Hp-del-U	5'-CTT TAT GGC ACT GGG GAA CAA GCA TTT TG-3')
	Hp-del-L	5'-CCC ATC AAC AGG AGG AAG GGT CAA TAC TGC-3',
	Hp-Ex1-U	5'-GCA GTG TGA AAA TCC TCC AAG ATA A-3'
	Hp-Ex1-L	5'-AAT TTA GCC CAT TTG CCC GTT TCT T-3'
