# Supplementary material for: Haplotype Association between Haptoglobin (Hp2) and Hp Promoter SNP (A-61C) May Explain Previous Controversy of Haptoglobin and Malaria Protection
Source: PLoS One. 2007 Apr 11;2(4):e362. doi: 10.1371/journal.pone.0000362 (PMC1838521; doi:10.1371/journal.pone.0000362)
Supplement: Table S3 — First Round and Extension Primers for G6PD, HbS, A-61C and C-101G (0.02 MB XLS) [file pone.0000362.s003.xls]

## Sheet: Sheet1
	Table S3. First Round and Extension Primers for G6PD, HbS, A-61C and C-101G
	Genotype	rs no	First round primers	Extension primers
	G6PD A	1050829	ACGTTGGATGATGATGCAGCCTCCTACCAG	AGCGCCTCAACAGCCACATG
			ACGTTGGATGTAGAAGAGGCGGTTGGCCTG
	HbS	334	ACGTTGGATGTTCATCCACGTTCACCTTGC	AGGGCAGTAACGGCAGACTTCTCC
			ACGTTGGATGAAACAGACACCATGGTGCAC
	A-61C	5471	ACGTTGGATGTTATGCTGCCACTAGCTCAC	ACTTCTCCCCCTTCTCCA
			ACGTTGGATGGAGCTCAACTCTTAACAGGG
	C-101G	5470	ACGTTGGATGTTATGCTGCCACTAGCTCAC	ACTTTGGCCCTGGTAAG
			ACGTTGGATGGAGCTCAACTCTTAACAGGG
	Designed by Sequenom Primer Designer Software™
